# Supplementary material for: Control of manganese dioxide crystallographic structure in the redox reaction between graphene and permanganate ions and their electrochemical performance
Source: Royal Society of Chemistry journal article supplement (doi:10.1039/c5ra01455g), 2015-01-01
Supplement: c5ra01455g1.pdf [file c5ra01455g1.pdf]

**Control of Manganese Dioxide Crystallographic Structure in the Redox Reaction  
between Graphene and Permanganate Ions and Their Electrochemical  
Performance**

*Chenchen Ji<sup>1</sup>, Haoqi Ren<sup>3</sup>, Shengchun Yang<sup>\*1,2</sup>,*

1 School of Science, Key Laboratory of Shanxi for Advanced Materials and Mesoscopic Physics, State Key Laboratory for Mechanical Behavior of Materials, Xi'an Jiaotong University, Xi'an, 710049, People's Republic of China.

2 Collaborative Innovation Center of Suzhou Nano Science and Technology, Suzhou Academy of Xi'an jiaotong University, 215000, Suzhou, People's Republic of China.

3 Department of Chemistry, Fudan University, Shanghai 200433, People's Republic of China.

**\*Corresponding author**

Tel: +86-29-82663034. Fax: +86-29-82665995. E-mail: [ysch1209@mail.xjtu.edu.cn](mailto:ysch1209@mail.xjtu.edu.cn)

(S.C. Yang)

---

According to the previous study, the graphene sacrificial template shows many advantages toward the fabrication of MnO<sub>2</sub> pseudocapacitance materials, such as the templating process described in these study is much simpler than the conventional template methods. And the obtained samples show controllable structure with a high specific surface area.<sup>1,2</sup> What is more, the layered structure and a high surface area make the graphene was reactive, and leading to the simultaneous complete replacement of the template by the corresponding materials.<sup>1,2</sup>

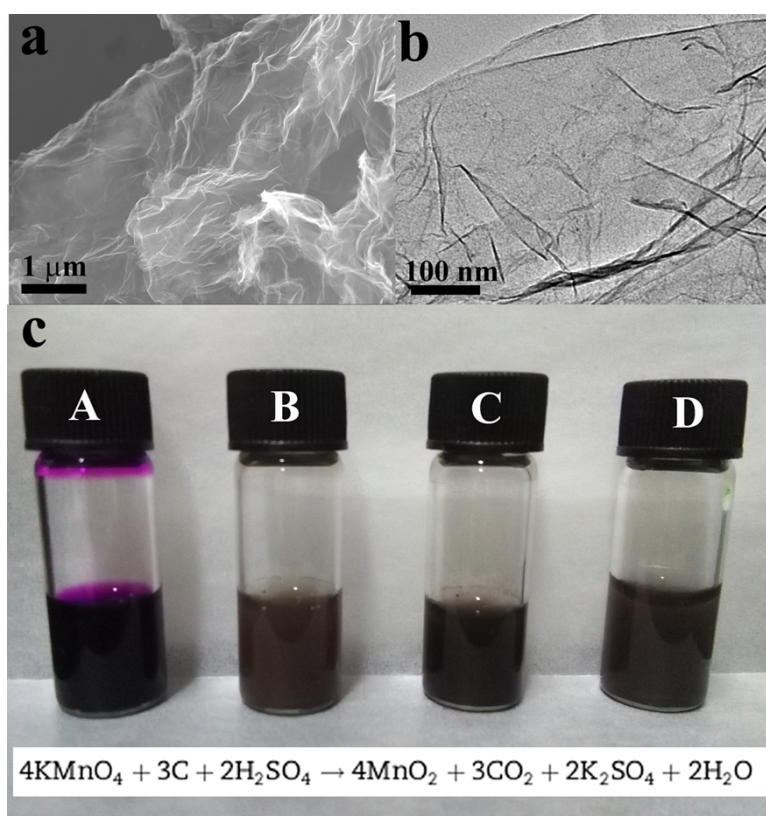

Fig. S1 (a and b) SEM and TEM images of the pristine graphene. (c) Photographs demonstrating the reaction between graphene and KMnO<sub>4</sub> solution. (A) Purple color of the solution after the reaction without adding any amount of graphene. Color change of the solution from Purple color to black-brown suspension after the reaction for the (B)  $\alpha+\gamma$ -MnO<sub>2</sub>, (C)  $\delta$ -MnO<sub>2</sub> and (D)  $\alpha$ -MnO<sub>2</sub> reaction systems.

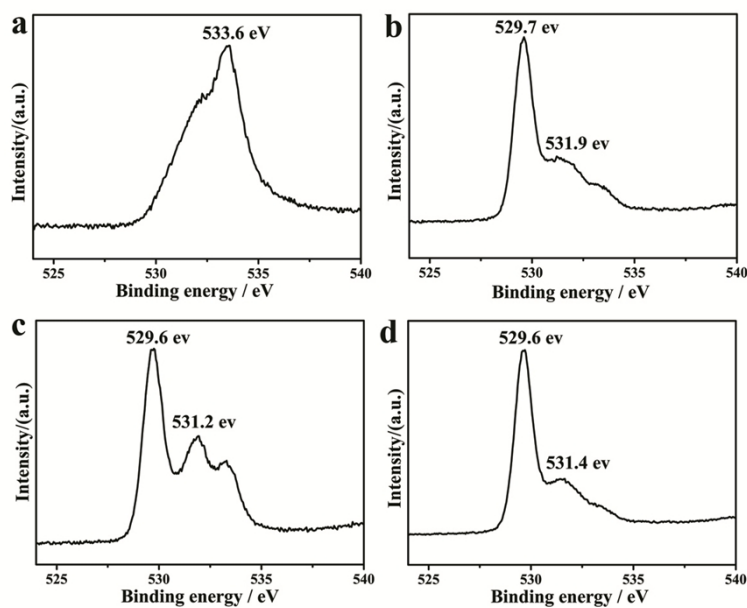

Fig. S2 XPS spectra of the O 1s region for the (a) graphene, (b)  $\alpha+\gamma$ -MnO<sub>2</sub>, (c)  $\delta$ -MnO<sub>2</sub> and (d)  $\alpha$ -MnO<sub>2</sub> samples.

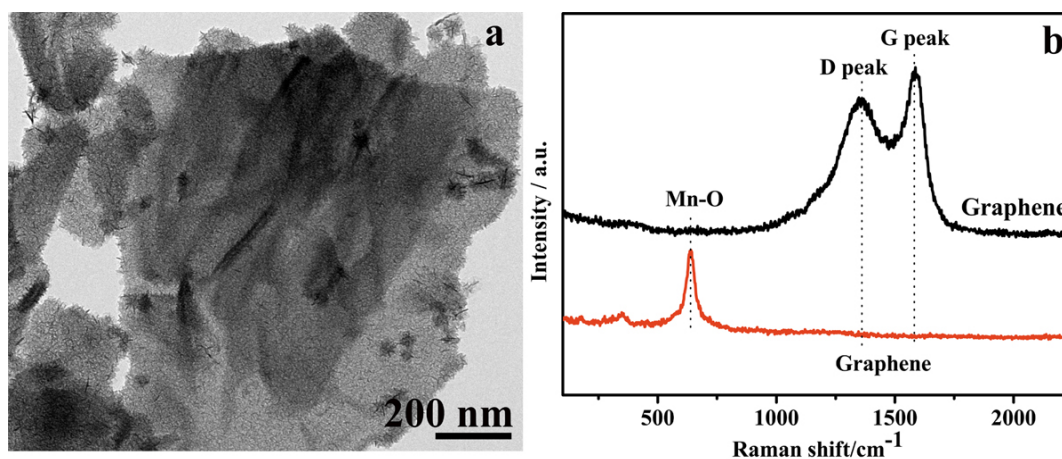

Fig. S3 (a) TEM images of the sample prepared when the amount ratio of graphene : KMnO<sub>4</sub> = 10 mg : 100 mg at 85 °C without adding any H<sub>2</sub>SO<sub>4</sub>. (b) The corresponding Raman spectra of the graphene and the as-prepared samples.

Fig. S3a shows that the folded and wrinkled characters of graphene transformed to the obtained MnO<sub>2</sub> sample (prepared when the amount ratio of graphene : KMnO<sub>4</sub> = 10 mg : 100 mg at 85 °C without adding any H<sub>2</sub>SO<sub>4</sub>). The complete disappearance

---

of the D and G bands of graphene and the appearance of the peaks located at  $630\text{ cm}^{-1}$  can be observed in the raman spectra, which indicated the yield of pure  $\text{MnO}_2$  with the depletion of graphene (Fig.S3b).

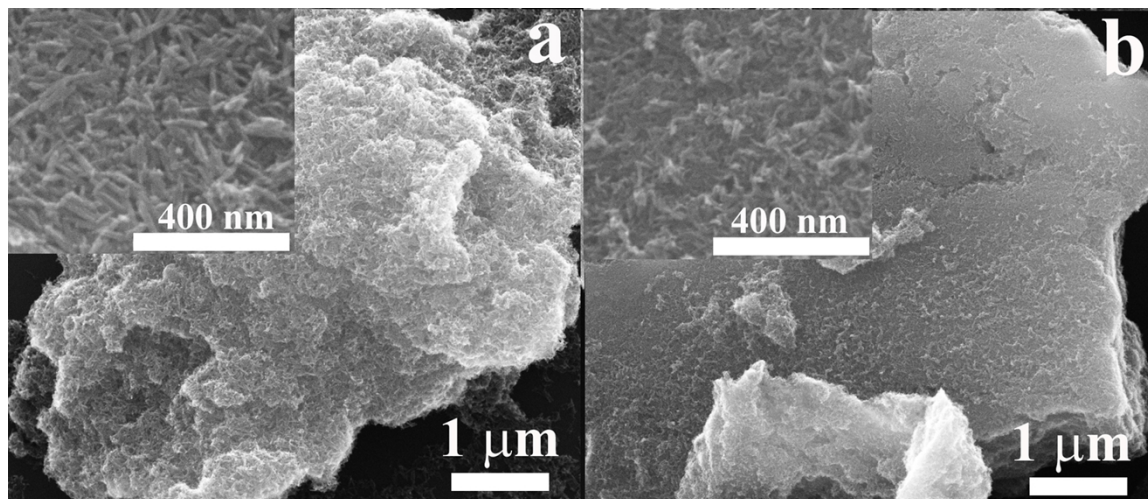

Fig. S4 SEM image of the sample prepared when 10 mg graphene and 100 mg  $\text{KMnO}_4$  was used at  $85\text{ }^\circ\text{C}$  with (a)  $500\text{ }\mu\text{L H}_2\text{SO}_4$ , (b)  $5\text{ mL H}_2\text{SO}_4$ .

## REFERENCES

- (1) Xie, X.; Zhang, C.; Wu, M. B.; Tao, Y.; Lv, W.; Yang, Q. H. Porous  $\text{MnO}_2$  for Use in a High Performance Supercapacitor: Replication of a 3D Graphene Network as a Reactive Template. *Chem. Commun.* **2013**, *49*, 11092-11094.
- (2) Zhao, G.; Li, J.; Jiang, L.; Dong, H.; Wang, X.; Hu, W. Synthesizing  $\text{MnO}_2$  Nanosheets from Graphene Oxide Templates for High Performance Pseudosupercapacitors. *Chem. Sci.* **2012**, *3*, 433-7.
